# Supplementary material for: Risk factors for postoperative hypocalcaemia after thyroidectomy: A systematic review and meta-analysis
Source: PubMed Central journal article supplement — J Int Med Res. 2021 Mar 29;49(3):0300060521996911. doi: 10.1177/0300060521996911 (PMC8010841; doi:10.1177/0300060521996911), 2021-03-29

Table1 Study characteristics.

| First Author  | Country | Study design                           | Patients (n) | Rate of Postoperative hypocalcemia (%)                                                                | NOS score   | Risk factor                                                                                                                                                                                 |
|---------------|---------|----------------------------------------|--------------|-------------------------------------------------------------------------------------------------------|-------------|---------------------------------------------------------------------------------------------------------------------------------------------------------------------------------------------|
| Liu 2020 (8)  | USA     | retrospective cross-sectional analysis | 126,766      | 30-day follow-up after surgery:19.1%                                                                  | ★★★★★<br>★★ | Age, women, vitamin D deficiency, concurrent lateral neck dissection, concurrent central neck dissection, intraoperative parathyroid, recurrent laryngeal nerve injury, magnesium disorders |
|               |         |                                        |              | 1-year follow-up after surgery: 4.4%                                                                  |             |                                                                                                                                                                                             |
| Lale 2019 (9) | Turkey  | Retrospective case control             | 818          | Permanent hypocalcaemia (>one year):26.7%                                                             | ★★★★★<br>★  | Female, specimen weight, substernal localization, cervical lymph node dissection (CLND)                                                                                                     |
|               |         |                                        |              | Transient hypocalcaemia(calcium level is lower than 8 mg/dl at 24 and 72 h after thyroidectomy): 1.7% |             |                                                                                                                                                                                             |

|                          |         |                               |                                                            |                                                          |             |                                                                                                                                                          |
|--------------------------|---------|-------------------------------|------------------------------------------------------------|----------------------------------------------------------|-------------|----------------------------------------------------------------------------------------------------------------------------------------------------------|
| Carvalho<br>2019<br>(10) | Brazil  | Retrospective<br>cohort study | 1347                                                       | Hypocalcaemia: 21%                                       | ★★★★★<br>★  | Neck dissection, malignancy, gender,<br>age, preoperative total Ca, preoperative<br>PTH; preoperative vitamin D, central<br>compartment dissection (CCD) |
| Wang W<br>2019(11)       | China   | Retrospective<br>cohort study | 242                                                        | Hypocalcaemia 60%                                        | ★★★★★<br>★  | Gender, extent of surgery,<br>hypoparathyroidism, LND,<br>hypomagnesemia, pre-Ca                                                                         |
| Claudius<br>2018(12)     | Germany | Retrospective<br>case study   | 702                                                        | Postoperative biochemical<br>hypocalcaemia (48 h): 22.8% | ★★★★★       | Symptomatic hypocalcaemia,<br>female, parathyroid reimplantation,<br>surgery time ( $\geq 189$ min),<br>thyreostatic drug therapy                        |
|                          |         |                               | Persistent biochemical<br>hypocalcaemia (> 6 months): 6.8% |                                                          |             |                                                                                                                                                          |
| Docimo<br>2017(13)       | Italian | Retrospective<br>case control | 328                                                        | Symptomatic hypocalcaemia: 7.9%                          | ★★★★★<br>★★ | malignant pathology, CCND                                                                                                                                |
|                          |         |                               | Transient hypocalcaemia: 14.6%                             |                                                          |             |                                                                                                                                                          |
|                          |         |                               | Permanent hypocalcaemia: 0.6%                              |                                                          |             |                                                                                                                                                          |
| Luo<br>2017(14)          | China   | Retrospective<br>case control | 304                                                        | Biochemical hypocalcemia: 26.9%                          | ★★★★★       | Sex(male/female), Po<br>hypomagnesemia: Po hypocalcemia, Po                                                                                              |

|                |       |                            |         |                                        |              |                                                                                                                                                                                        |
|----------------|-------|----------------------------|---------|----------------------------------------|--------------|----------------------------------------------------------------------------------------------------------------------------------------------------------------------------------------|
|                |       |                            |         | Symptomatic hypocalcemia: not reported |              | hypomagnesemia, Po iPTH<1.6 pmol/L, relative decline of iPTH>70%                                                                                                                       |
| Wang X2017(15) | China | Retrospective case control | 237     | Biochemical hypocalcemia: 52.3%        | ★★★★★<br>★   | Bilateral CCND, MRND, PTG autotransplantation, hypoparathyroidism, hypomagnesaemia                                                                                                     |
|                |       |                            |         | Symptomatic hypocalcemia: 33.8%        |              |                                                                                                                                                                                        |
| Cho 2016(16)   | Korea | Retrospective cohort study | 1030    | Transient hypocalcemia: 28.2%;         | ★★★★★<br>★   | Age, gender (female), CND, MRND, extent of CND (bilateral), operation time, implant of parathyroid gland, parathyroid gland in pathology                                               |
|                |       |                            |         | Permanent hypocalcemia: 2.6%           |              |                                                                                                                                                                                        |
| Jason 2016(17) | USA   | Retrospective cohort study | 620,744 | Hypocalcaemia 6%                       | ★★★★★<br>★★★ | Magnesium disorder, phosphate disorder, female, age, medicaid payor status, thyroid cancer, total thyroidectomy, neck dissection, recurrent laryngeal nerveinjury, high-volume surgeon |

|                     |         |                                |     |                                       |       |                                                                                                                                                                                  |
|---------------------|---------|--------------------------------|-----|---------------------------------------|-------|----------------------------------------------------------------------------------------------------------------------------------------------------------------------------------|
| Garrahy<br>2015(18) | Ireland | Retrospective<br>cohort study  | 201 | Biochemical hypocalcaemia<br>(22.9%); | ★★★★★ | Cancer diagnosis, central neck<br>dissection, hypomagnesemia, inadvertent<br>parathyroid resection                                                                               |
|                     |         |                                |     | Symptomatic hypocalcaemia:<br>(12.4%) | ★★    |                                                                                                                                                                                  |
| Bove(19)<br>2016    | Italian | Retrospective<br>cohort study  | 142 | Temporary hypocalcemia: 33%           | ★★★★★ | substernal goiter (SG)                                                                                                                                                           |
|                     |         |                                |     | Permanent hypocalcemia: 2.8%          | ★     |                                                                                                                                                                                  |
| LeeG2015(<br>20)    | Korea   | Rerospective<br>case study     | 134 | Laboratory pocalcemia: (39 %)         | ★★★★★ | Age, sex (women), BMI, preoperative<br>calcium, preoperative PTH,<br>vitamin D (<20 ng/mL), vitamin D (<10<br>ng/mL), selective neck dissection,<br>incidental parathyroidectomy |
|                     |         |                                |     | Symptomatic pocalcemia: (19 %)        | ★     |                                                                                                                                                                                  |
| Talal<br>2014(21)   | Arab    | Retrospective<br>cohort study. | 213 | Laboratorial Hypocalcemia: 19.7%      | ★★★★★ | Postoperative serum PTH,<br>preoperative serum 25(OH)D<25 nmol/L                                                                                                                 |
|                     |         |                                |     | Clinical Hypocalcemia: 17.8%          | ★     |                                                                                                                                                                                  |

|                      |         |                             |     |                                 |              |                                                                                                                                                                                                                                                                            |
|----------------------|---------|-----------------------------|-----|---------------------------------|--------------|----------------------------------------------------------------------------------------------------------------------------------------------------------------------------------------------------------------------------------------------------------------------------|
| Pavol<br>2014(22)    | Ireland | Prospective<br>cohort study | 788 | Temporary hypocalcemia: 23.9%   | ★★★★★<br>★★★ | Sex, age, preoperative diagnosis benign,<br>biclamp hemostasis, thyroid gland<br>weight, substernal extension,<br>tracheal deviation, operation time,<br>multinodular goiter, Graves disease,<br>Hashimoto thyroiditis,<br>thyroid cancer, incidental<br>parathyroidectomy |
|                      |         |                             |     | Symptomatic hypocalcemia: 14.0% |              |                                                                                                                                                                                                                                                                            |
| Servicio<br>2013(23) | Spain   | prospective<br>cohort study | 113 | Hypocalcaemia 38.90%            | ★★★★★<br>★   | Vitamina D preoperatoria < 15 ng/mL,<br>PTH postoperatoria < 13 pg/mL                                                                                                                                                                                                      |

|                  |        |                            |         |                                |              |                                                                                                                                                                                                                                                                                                                                                                                                                               |
|------------------|--------|----------------------------|---------|--------------------------------|--------------|-------------------------------------------------------------------------------------------------------------------------------------------------------------------------------------------------------------------------------------------------------------------------------------------------------------------------------------------------------------------------------------------------------------------------------|
| Randall2012 (24) | USA    | Retrospective case section | 118,375 | Hypocalcaemia 5.50%            | ★★★★★<br>★★★ | Age, female gender, ethnicity, Hispanic, Asian or Pacific islander, native American, total thyroidectomy, thyroidectomy with unilateral neck dissection, thyroidectomy with bilateral neck dissection, complete substernal thyroidectomy, partial substernal thyroidectomy, substernal thyroidectomy, isthmectomy, partial thyroidectomy, length of stay (per day), nonteaching hospital, malignant neoplasm of thyroid gland |
| Sevim 2009(25)   | Turkey | Retrospective cohort study | 417     | Permanent hypocalcemia: 7.7%   | ★★★★★<br>★★  | Incidental parathyroidectomy, extrathyroidal soft tissue invasion                                                                                                                                                                                                                                                                                                                                                             |
| Erbil 2009(26)   | Turkey | Prospective cohort study   | 200     | Symptomatic hypocalcemia: 73%  | ★★★★★<br>★   | Age (older than 50 years); preoperative serum 25-OHD level less than 15 ng/mL                                                                                                                                                                                                                                                                                                                                                 |
|                  |        |                            |         | Asymptomatic hypocalcemia: 27% |              |                                                                                                                                                                                                                                                                                                                                                                                                                               |

|                      |             |                               |      |                      |              |                                                                                                                                                                                                                                                                         |
|----------------------|-------------|-------------------------------|------|----------------------|--------------|-------------------------------------------------------------------------------------------------------------------------------------------------------------------------------------------------------------------------------------------------------------------------|
| Bhandari<br>2017(27) | China       | Retrospective<br>case study   | 278  | Hypocalcaemia 27.30% | ★★★★★<br>★★★ | Age (years), lateral lymph node<br>dissection, lobectomy plus<br>isthmusectomy versus lobectomy,<br>near-total thyroidectomy versus<br>lobectomy, total thyroidectomy versus<br>lobectomy, injected versus non-injected,<br>gender (female),<br>preoperative PTH levels |
| Aqtashi<br>2017(28)  | Switzerland | Retrospective<br>cohort study | 34   | Hypocalcaemia 33%    | ★★★★★<br>★   | Operation interval, PTH pre-OP2 ,<br>Calcium pre-OP2                                                                                                                                                                                                                    |
| Lin2016(2<br>9)      | Taiwan      | Retrospective<br>case study   | 3186 | Hypocalcaemia 30.90% | ★★★★★<br>★★  | Age, gender(female), multituberos<br>goiter, Graves disease, malignant tumors,<br>total thyroidectomy, reoperation,<br>central cervical lymph node (CCLN),<br>thyroid malignancy                                                                                        |

|                     |             |                             |     |                                     |             |                                                                                                                                                           |
|---------------------|-------------|-----------------------------|-----|-------------------------------------|-------------|-----------------------------------------------------------------------------------------------------------------------------------------------------------|
| Tongol<br>2013 (30) | Philippines | Retrospective<br>case study | 242 | Symptomatic hypocalcemia:<br>10.74% | ★★★★★<br>★★ | Age, gender, thyroid disease (toxic,<br>nontoxic or malignant), thyroid gland<br>weight in grams, presence concomitant<br>complication of thyroidectomy   |
|                     |             |                             |     | Asymptomatic hypocalcemia:<br>1.24% |             | Hoarseness and/or hematoma, type of<br>surgery (total thyroidectomy), neck<br>dissection, duration of surgery in hours,<br>inadvertent, parathyroidectomy |

Table 2 Results of quality assessment

| Case control study evaluation results |        |               |          |
|---------------------------------------|--------|---------------|----------|
| Include<br>study                      | select | Comparability | Exposure |



|  |                                                                                                                                                                      |                                                                                                                                                    |                                                                                                               |                                                                                                              |                                                                                                                                                                                                                                                         |                                                                                                                                                                                                                          |                                                                                        |                                                                                                                                             |               |
|--|----------------------------------------------------------------------------------------------------------------------------------------------------------------------|----------------------------------------------------------------------------------------------------------------------------------------------------|---------------------------------------------------------------------------------------------------------------|--------------------------------------------------------------------------------------------------------------|---------------------------------------------------------------------------------------------------------------------------------------------------------------------------------------------------------------------------------------------------------|--------------------------------------------------------------------------------------------------------------------------------------------------------------------------------------------------------------------------|----------------------------------------------------------------------------------------|---------------------------------------------------------------------------------------------------------------------------------------------|---------------|
|  | <p>1) Is the case definition adequate?<br/> a) yes, with independent validation ★<br/> b) yes, eg record linkage or based on self reports<br/> c) no description</p> | <p>2) Representativeness of the cases<br/> a) consecutive or obviously representative series of cases ★<br/> b) potential biases or not stated</p> | <p>3) Selection of Controls<br/> a) community controls ★<br/> b) hospital controls<br/> c) no description</p> | <p>4) Definition of Controls<br/> a) no history of disease (endpoint) ★<br/> b) no description of source</p> | <p>1) Comparability of cases and controls on the basis of the design or analysis<br/> a) study controls for _____ (Select the most important factor.) ★<br/> b) study controls for any additional factor ★<br/> (This criteria could be modified to</p> | <p>1) Ascertainment of exposure<br/> a) secure record (eg surgical records) ★<br/> b) structured interview where blind to case/control status ★<br/> c) interview not blinded to case/control status<br/> d) written</p> | <p>2) Same method of ascertainment for cases and controls<br/> a) yes ★<br/> b) no</p> | <p>3) Non-Response rate<br/> a) same rate for both groups ★<br/> b) non respondents described<br/> c) rate different and no designation</p> | <p>Result</p> |
|--|----------------------------------------------------------------------------------------------------------------------------------------------------------------------|----------------------------------------------------------------------------------------------------------------------------------------------------|---------------------------------------------------------------------------------------------------------------|--------------------------------------------------------------------------------------------------------------|---------------------------------------------------------------------------------------------------------------------------------------------------------------------------------------------------------------------------------------------------------|--------------------------------------------------------------------------------------------------------------------------------------------------------------------------------------------------------------------------|----------------------------------------------------------------------------------------|---------------------------------------------------------------------------------------------------------------------------------------------|---------------|

|          |   |   |   |   |                                                                          |                                                                            |   |   |          |
|----------|---|---|---|---|--------------------------------------------------------------------------|----------------------------------------------------------------------------|---|---|----------|
|          |   |   |   |   | indicate<br>specific<br>control for<br>a second<br>important<br>factor.) | self<br>report or<br>medical<br>record<br>only<br>e) no<br>descriptio<br>n |   |   |          |
| Liu 2020 | a | b | a | a | a                                                                        | a                                                                          | a | a | ★★<br>★★ |

|               |   |   |   |   |   |   |   |   |                     |
|---------------|---|---|---|---|---|---|---|---|---------------------|
|               |   |   |   |   |   |   |   |   | ★★<br>★             |
| Lale 2019     | a | b | a | a | b | a | a | b | ★★<br>★★<br>★★      |
| Claudius 2018 | a | a | c | a | a | e | a | b | ★★<br>★★<br>★       |
| Docimo 2017   | c | b | a | a | a | a | a | a | ★★<br>★★<br>★★<br>★ |
| Luo 2017      | c | a | a | a | a | e | b | a | ★★<br>★★<br>★       |
| Wang X 2017   | a | a | c | a | b | a | b | b | ★★<br>★★<br>★       |

|                  |   |   |   |   |   |   |   |   |                      |
|------------------|---|---|---|---|---|---|---|---|----------------------|
| Lee G 2015       | a | a | c | a | a | a | a | b | ★★<br>★★<br>★★       |
| Randall2012      | a | a | a | a | a | a | a | a | ★★<br>★★<br>★★<br>★★ |
| Bhandari<br>2017 | a | a | a | a | a | a | a | a | ★★<br>★★<br>★★<br>★★ |
| Lin2016          | a | a | c | a | a | a | a | a | ★★<br>★★<br>★★<br>★  |
| Tongol 2013      | a | a | a | a | a | a | a | b | ★★<br>★★<br>★★<br>★  |

Cohort study evaluation results

| Include study | Selection | Comparability | Outcome |
|---------------|-----------|---------------|---------|
|---------------|-----------|---------------|---------|

|  |                                                                                                                                                                                                                                                                                                                  |                                                                                                                                                                                                                            |                                                                                                                                                                             |                                                                                                                 |                                                                                                                                                                                                                                                                         |                                                                                                                                                    |                                                                                                                                                      |                                                                                                                                                                                                           |               |
|--|------------------------------------------------------------------------------------------------------------------------------------------------------------------------------------------------------------------------------------------------------------------------------------------------------------------|----------------------------------------------------------------------------------------------------------------------------------------------------------------------------------------------------------------------------|-----------------------------------------------------------------------------------------------------------------------------------------------------------------------------|-----------------------------------------------------------------------------------------------------------------|-------------------------------------------------------------------------------------------------------------------------------------------------------------------------------------------------------------------------------------------------------------------------|----------------------------------------------------------------------------------------------------------------------------------------------------|------------------------------------------------------------------------------------------------------------------------------------------------------|-----------------------------------------------------------------------------------------------------------------------------------------------------------------------------------------------------------|---------------|
|  | <p>1) Representativeness of the exposed cohort</p> <p>a) truly representative of the average _____</p> <p>(describe) in the community ★</p> <p>b) somewhat representative of the average _____</p> <p>in the community ★</p> <p>c) selected group of users eg nurses, volunteers</p> <p>d) no description of</p> | <p>2) Selection of the non exposed cohort</p> <p>a) drawn from the same community as the exposed cohort ★</p> <p>b) drawn from a different source</p> <p>c) no description of the derivation of the non exposed cohort</p> | <p>3) Ascertainment of exposure</p> <p>a) secure record (eg surgical records) ★</p> <p>b) structured interview ★</p> <p>c) written self report</p> <p>d) no description</p> | <p>4) Demonstration that outcome of interest was not present at start of study</p> <p>a) yes ★</p> <p>b) no</p> | <p>1) Comparability of cohorts on the basis of the design or analysis</p> <p>a) study controls for _____</p> <p>_____ (select the most important factor) ★</p> <p>b) study controls for any additional factor ★</p> <p>(This criteria could be modified to indicate</p> | <p>1) Assessment of outcome</p> <p>a) independent blind assessment ★</p> <p>b) record linkage ★</p> <p>c) self report</p> <p>d) no description</p> | <p>2) Was follow-up long enough for outcomes to occur</p> <p>a) yes (select an adequate follow up period for outcome of interest) ★</p> <p>b) no</p> | <p>3) Adequacy of follow up of cohorts</p> <p>a) complete follow up - all subjects accounted for ★</p> <p>b) subjects lost to follow up unlikely to introduce bias - small number lost - &gt; _____ %</p> | <p>Result</p> |
|--|------------------------------------------------------------------------------------------------------------------------------------------------------------------------------------------------------------------------------------------------------------------------------------------------------------------|----------------------------------------------------------------------------------------------------------------------------------------------------------------------------------------------------------------------------|-----------------------------------------------------------------------------------------------------------------------------------------------------------------------------|-----------------------------------------------------------------------------------------------------------------|-------------------------------------------------------------------------------------------------------------------------------------------------------------------------------------------------------------------------------------------------------------------------|----------------------------------------------------------------------------------------------------------------------------------------------------|------------------------------------------------------------------------------------------------------------------------------------------------------|-----------------------------------------------------------------------------------------------------------------------------------------------------------------------------------------------------------|---------------|

|  |                              |  |  |  |                                                  |  |  |                                                                                                                                                                                         |  |
|--|------------------------------|--|--|--|--------------------------------------------------|--|--|-----------------------------------------------------------------------------------------------------------------------------------------------------------------------------------------|--|
|  | the derivation of the cohort |  |  |  | specific control for a second important factor.) |  |  | (select an adequate %) follow up, or description provided of those lost) ★<br>c) follow up rate < _____ %<br>(select an adequate %) and no description of those lost<br>d) no statement |  |
|--|------------------------------|--|--|--|--------------------------------------------------|--|--|-----------------------------------------------------------------------------------------------------------------------------------------------------------------------------------------|--|

|                  |   |   |   |   |   |   |   |   |                      |
|------------------|---|---|---|---|---|---|---|---|----------------------|
| Carvalho<br>2018 | a | a | a | a | b | d | a | d | ★★<br>★★<br>★★       |
| Wang W 2019<br>等 | a | a | a | a | a | a | b | d | ★★<br>★★<br>★★       |
| Jason 2016       | b | a | b | a | a | b | a | a | ★★<br>★★<br>★★<br>★★ |
| Garrahy 2015     | a | a | b | a | a | d | a | a | ★★<br>★★<br>★★<br>★  |
| Bove 2016        | b | a | b | a | a | d | a | d | ★★<br>★★<br>★★       |
| Talal 2014       | a | a | a | a | b | d | b | a | ★★<br>★★<br>★★       |



|               |   |   |   |   |   |   |   |   |                     |
|---------------|---|---|---|---|---|---|---|---|---------------------|
| Pavol 2014    | a | a | b | a | a | d | b | a | ★★<br>★★<br>★★      |
| Servicio 2013 | b | a | a | a | a | a | b | d | ★★<br>★★<br>★★      |
| Sevim 2009    | a | a | a | a | a | b | a | d | ★★<br>★★<br>★★<br>★ |
| Erbil 2009    | a | a | b | a | a | d | a | d | ★★<br>★★<br>★★      |
| Aqtashi 2017  | a | a | a | a | a | d | a | d | ★★<br>★★<br>★★      |
| Cho 2016      | a | a | a | a | a | b | b | d | ★★<br>★★<br>★★      |

Figure 1

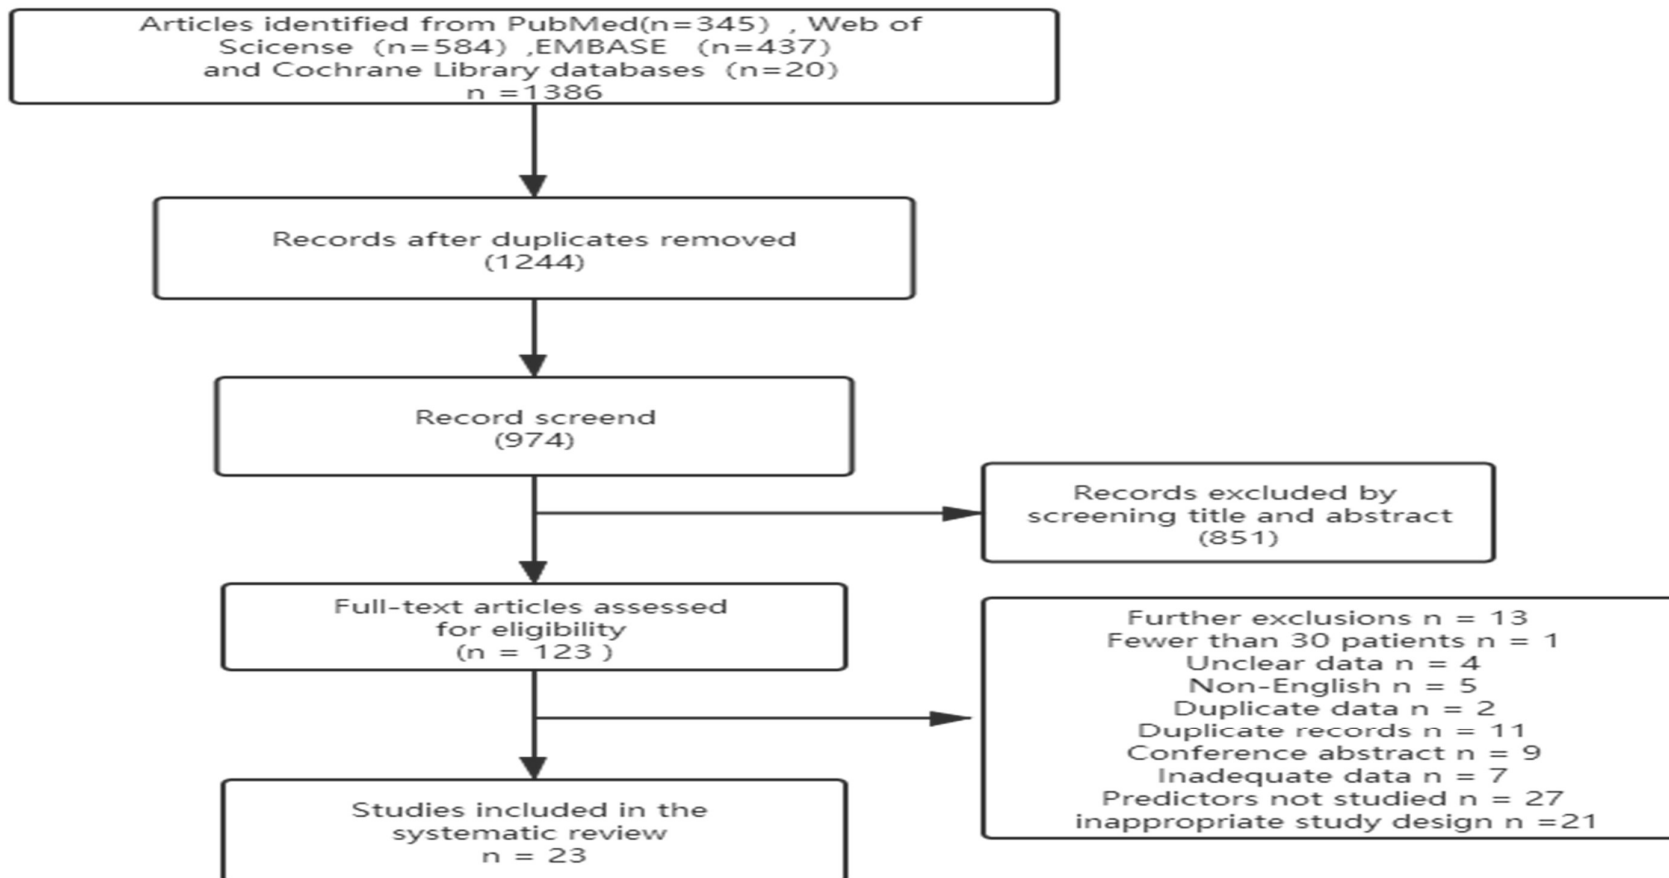

Female Figure 2

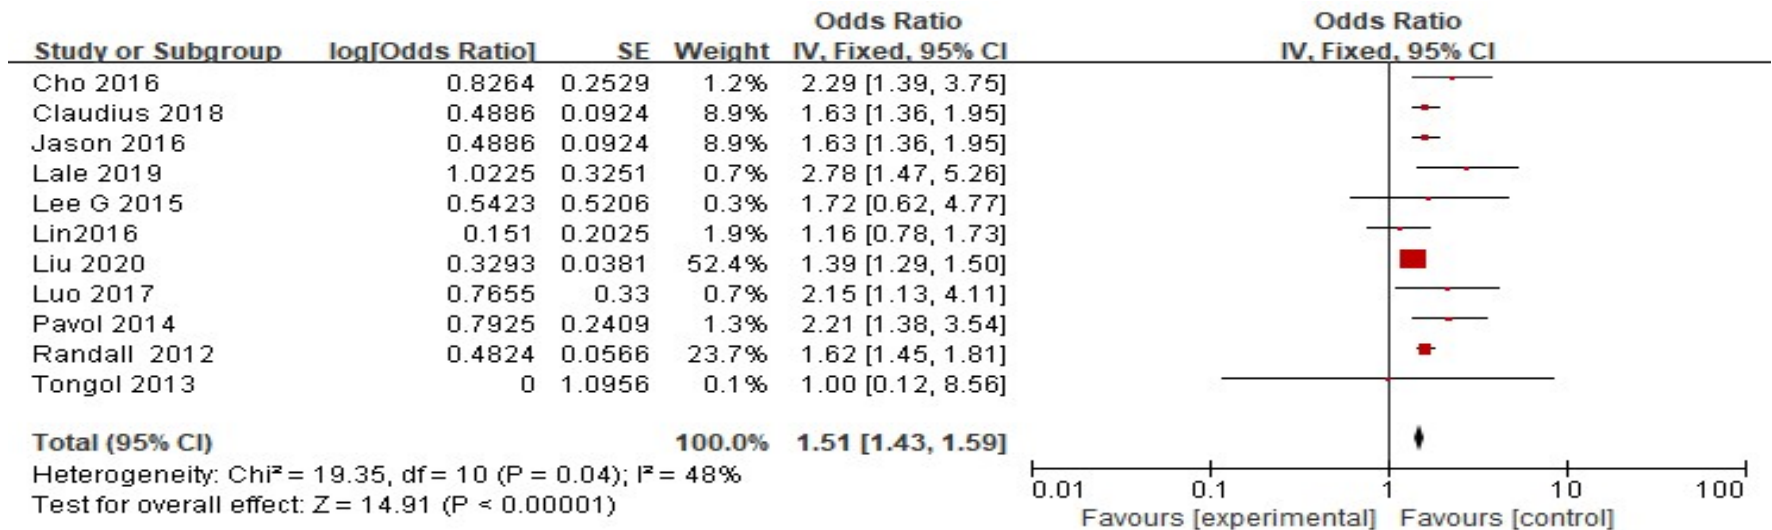

**Preoperative vitamin D** Figure 3

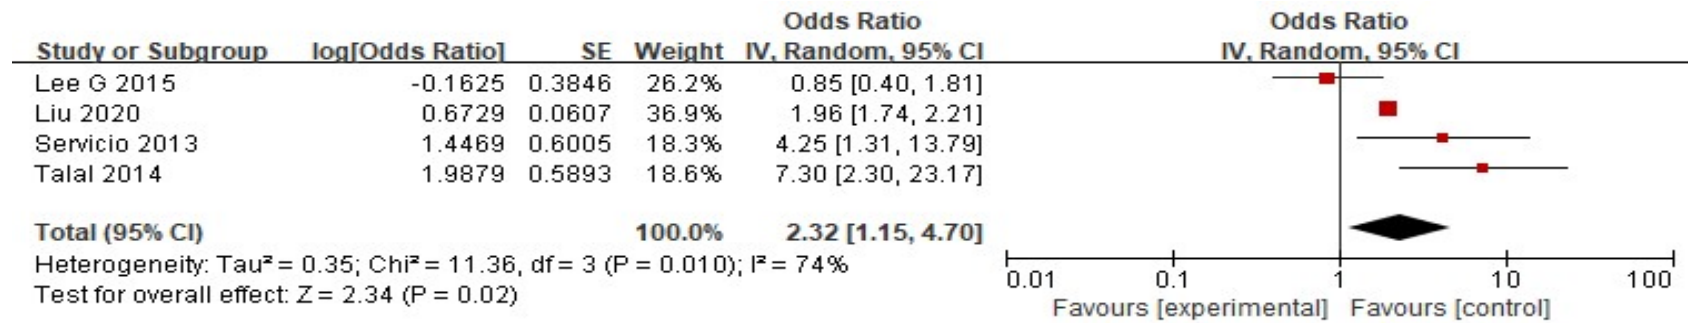

**Hypomagnesemia** Figure 4

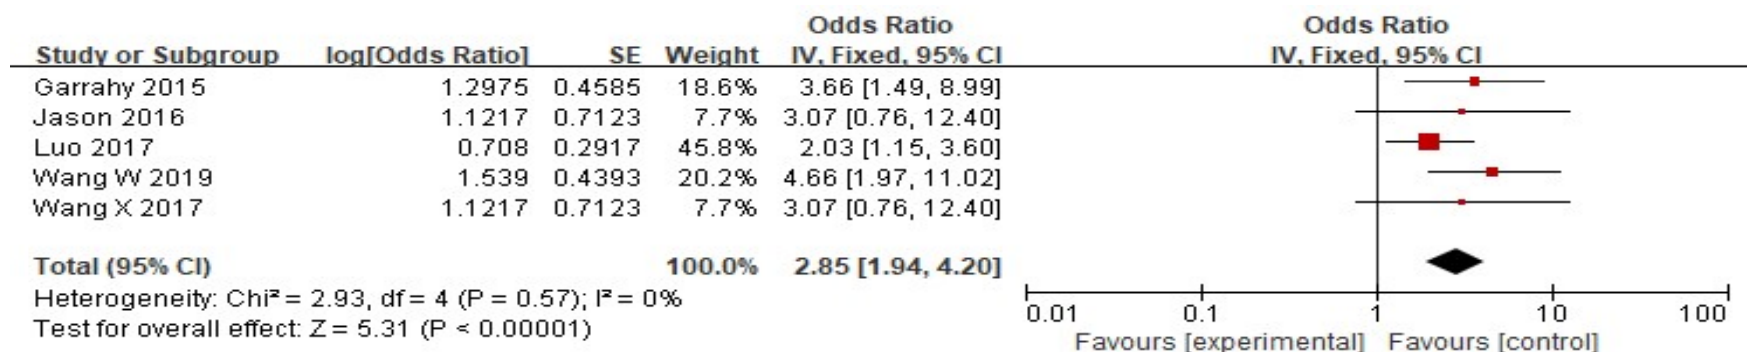

## Hypoparathyroidism Figure 5

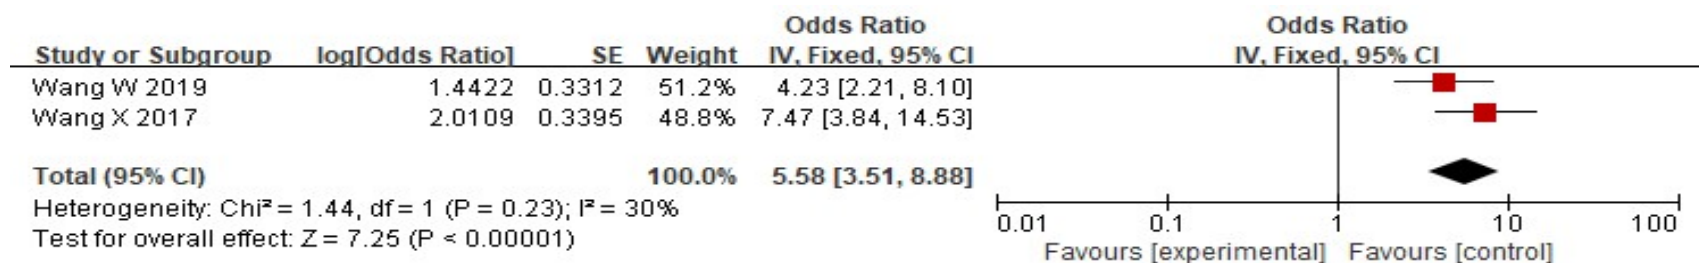

**Thyroid malignancy** Figure 6

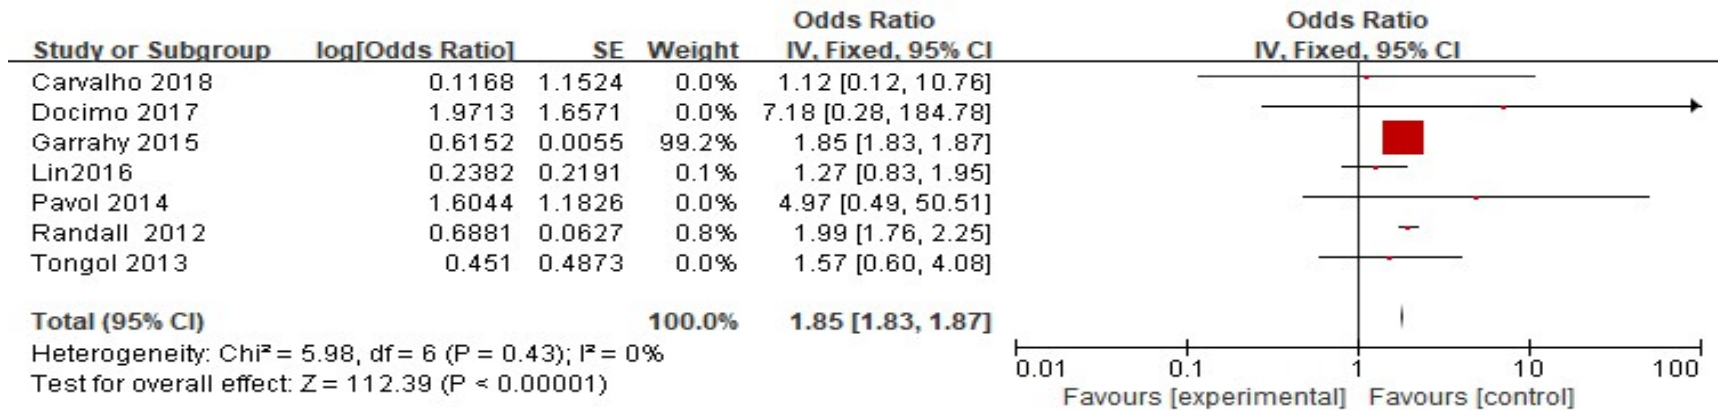

**Central neck dissection(CND)** Figure 7

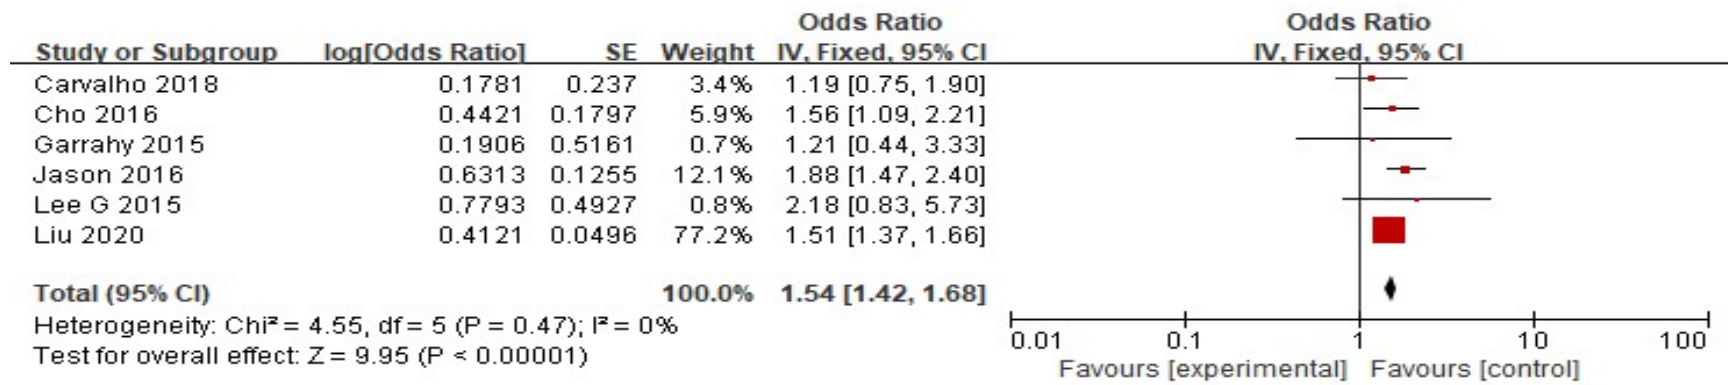

**Total thyroidectomy** Figure 8



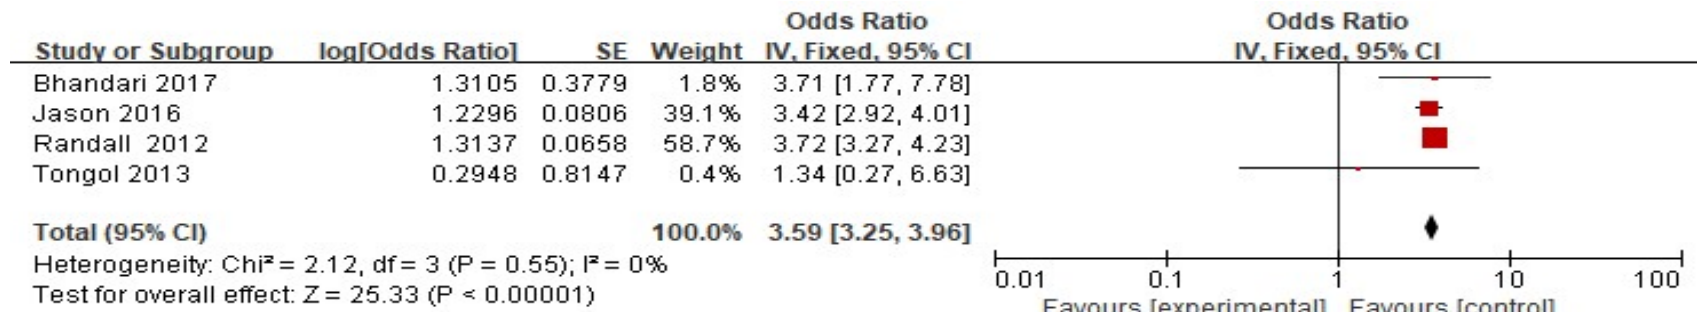

## Central compartment neck dissection Figure 9

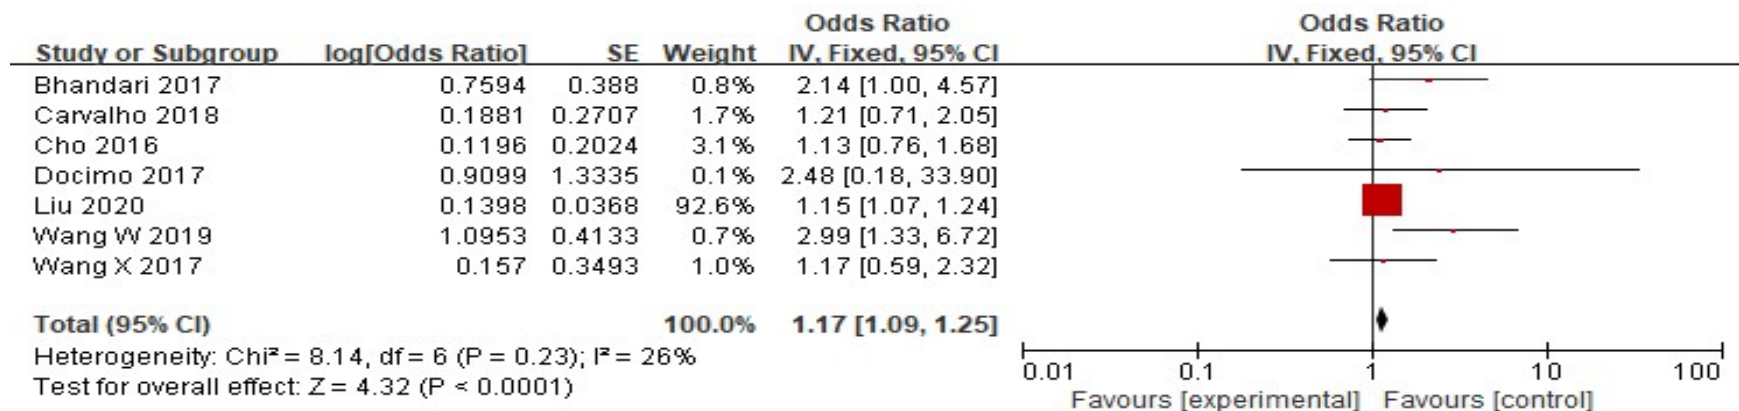

## Modified radical neck dissection(MRND) Figure 10

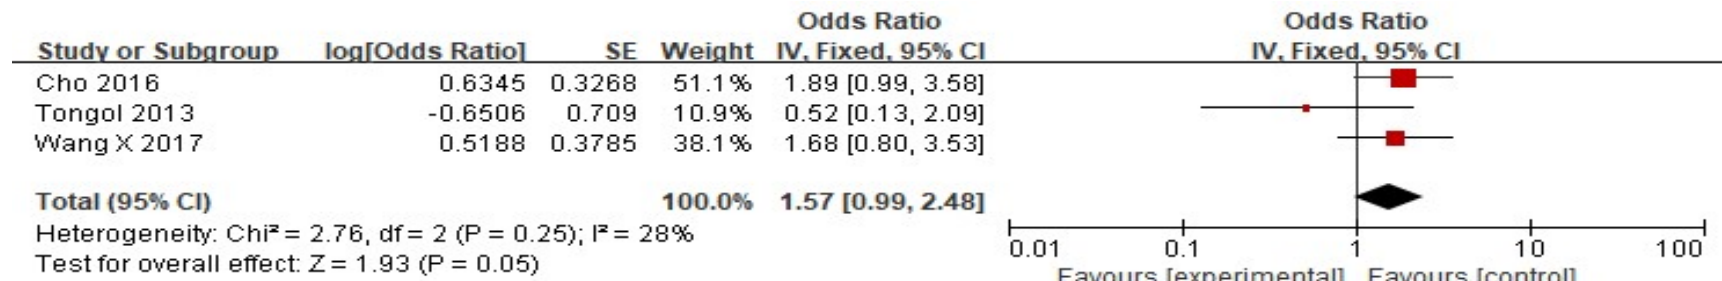

## Incidental parathyroidectomy Figure 11

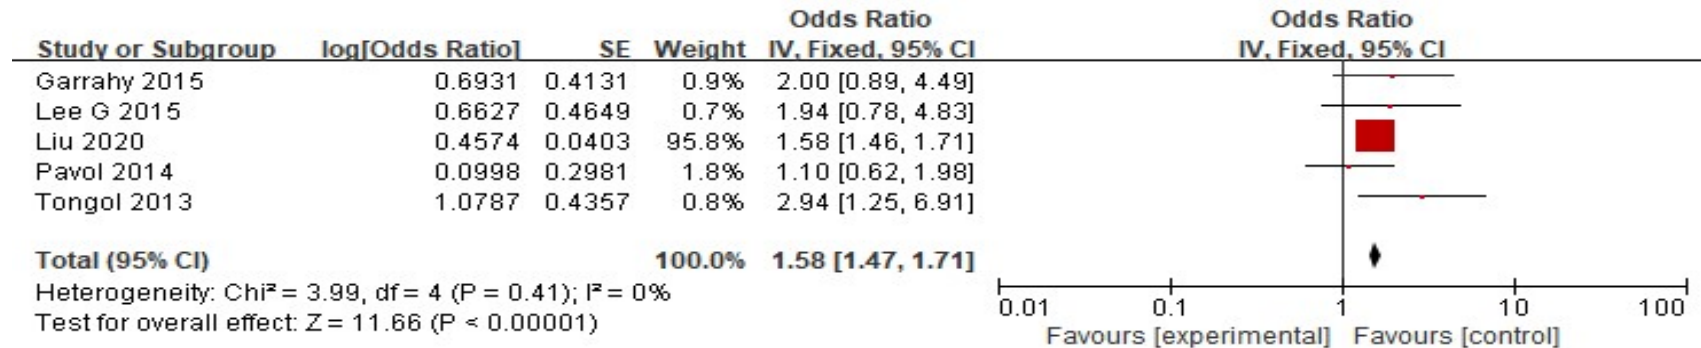

## Multinodular goitre Figure 12

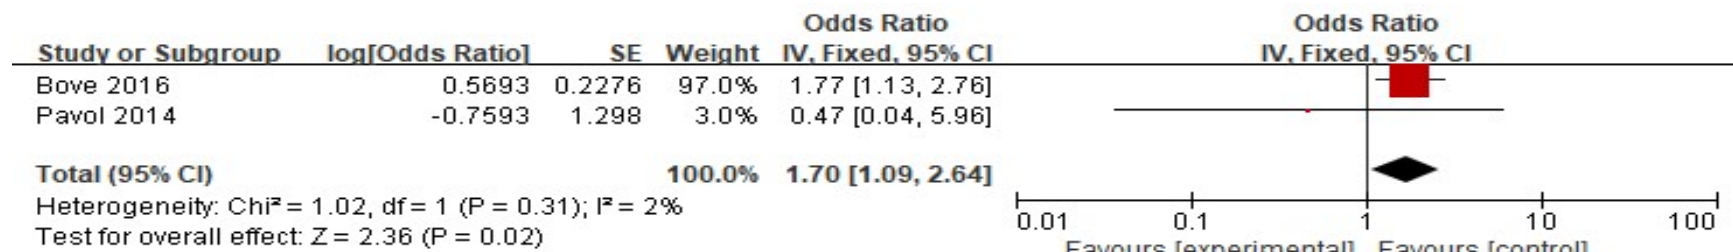

## Thyroiditis Figure 13

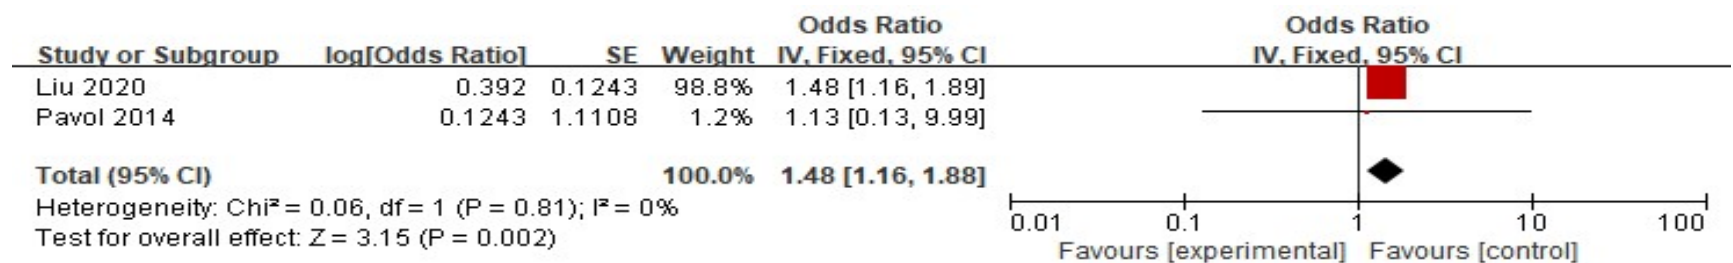

**Preoperative calcium level** Figure 14

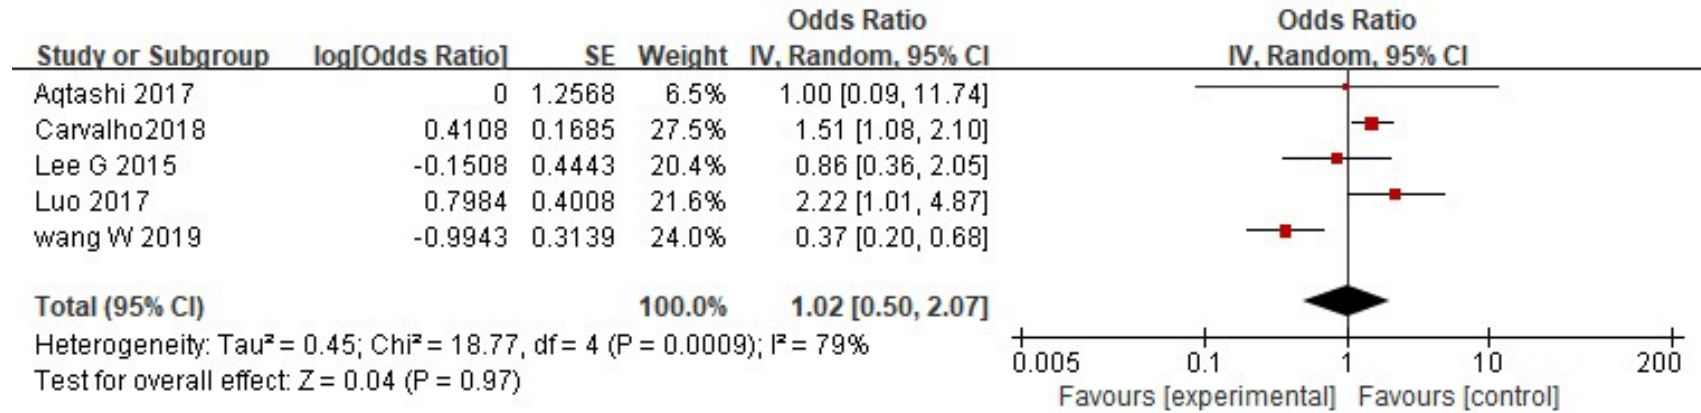

**Preoperative PTH** Figure 15

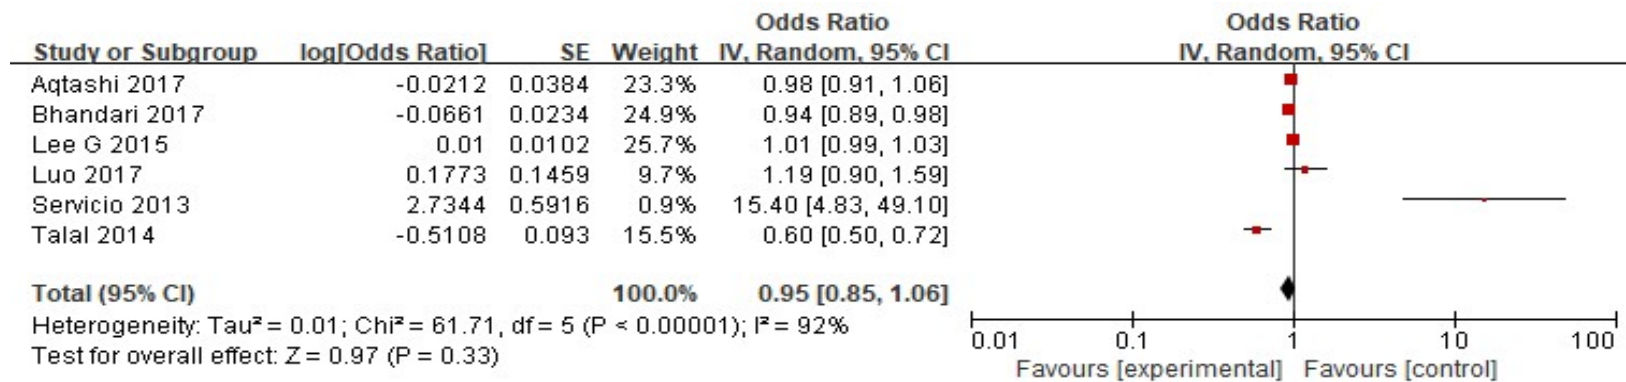

Graves diseases Figure 16

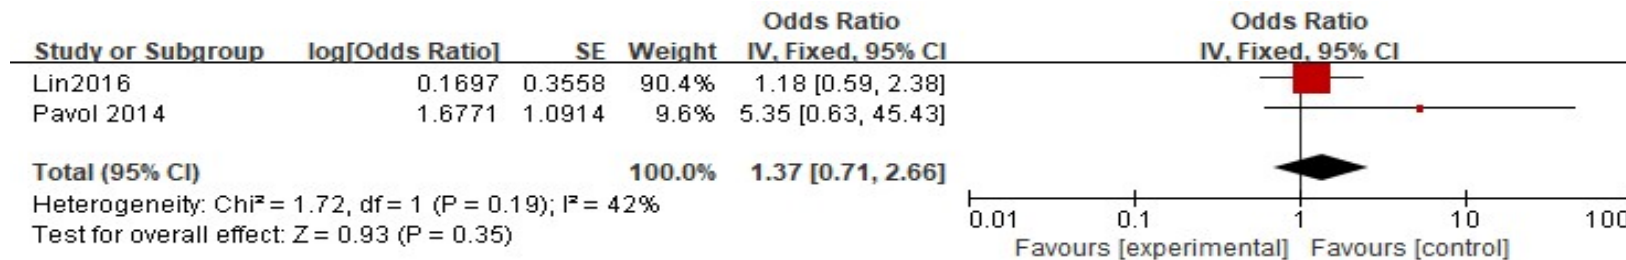

**Surgery time** Figure 17

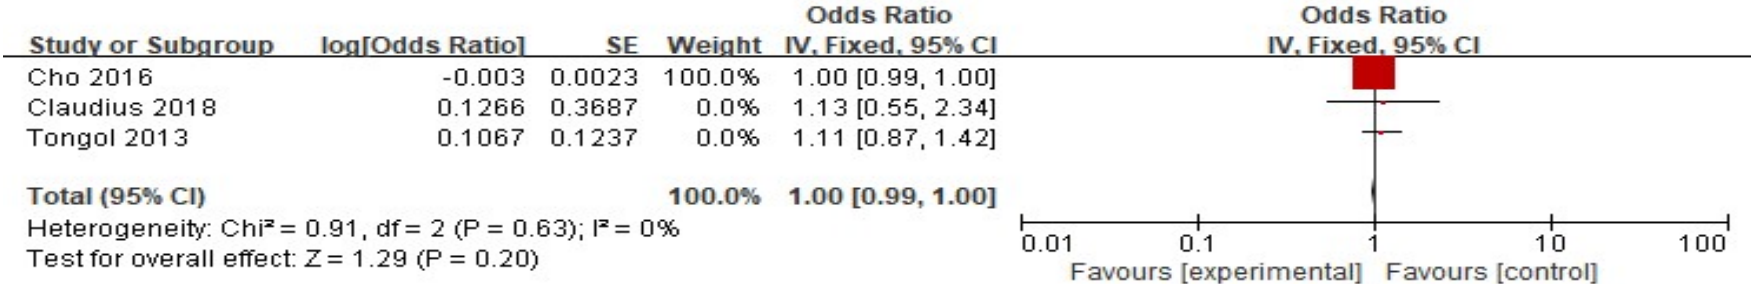

**Age** Figure 18

| Study or Subgroup     | log[Odds Ratio] | SE     | Weight        | Odds Ratio<br>IV, Random, 95% CI |
|-----------------------|-----------------|--------|---------------|----------------------------------|
| Carvalho 2018         | -5.5215         | 4.2584 | 0.0%          | 0.00 [0.00, 16.86]               |
| Cho 2016              | -0.0121         | 0.0068 | 22.7%         | 0.99 [0.97, 1.00]                |
| Lee G 2015            | 0               | 0.0155 | 7.0%          | 1.00 [0.97, 1.03]                |
| Lin2016               | 0.01            | 0.01   | 14.0%         | 1.01 [0.99, 1.03]                |
| Pavol 2014            | -0.0141         | 0.0052 | 29.0%         | 0.99 [0.98, 1.00]                |
| Randall 2012          | -0.0101         | 0.007  | 22.0%         | 0.99 [0.98, 1.00]                |
| Tongol 2013           | 0.0177          | 0.0183 | 5.3%          | 1.02 [0.98, 1.06]                |
| <b>Total (95% CI)</b> |                 |        | <b>100.0%</b> | <b>0.99 [0.98, 1.00]</b>         |

Heterogeneity:  $\tau^2 = 0.00$ ;  $\chi^2 = 8.94$ ,  $df = 6$  ( $P = 0.18$ );  $I^2 = 33\%$   
 Test for overall effect:  $Z = 1.51$  ( $P = 0.13$ )

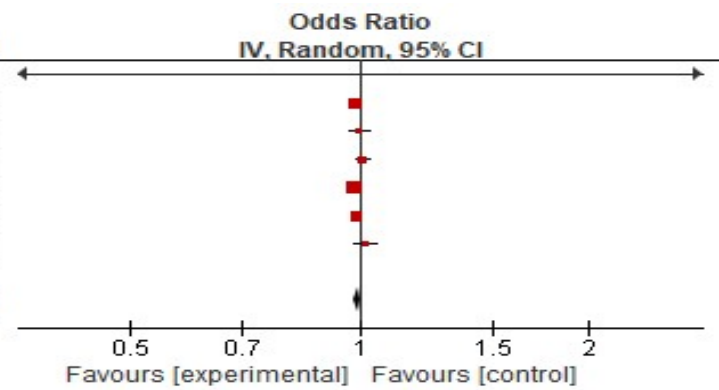

Supplement: sj-pdf-2-imr-10.1177_0300060521996911.pdf [file sj-pdf-2-imr-10.1177_0300060521996911.pdf]
