# Supplementary material for: Risk factors for postoperative hypocalcaemia after thyroidectomy: A systematic review and meta-analysis
Source: PubMed Central journal article supplement — J Int Med Res. 2021 Mar 29;49(3):0300060521996911. doi: 10.1177/0300060521996911 (PMC8010841; doi:10.1177/0300060521996911), 2021-03-29

Supplementary Figure 19. Begg's funnel plot of studies included in a meta-analysis to evaluate the risk factors for postoperative hypocalcaemia after thyroidectomy in adult patients. OR, odds ratio.

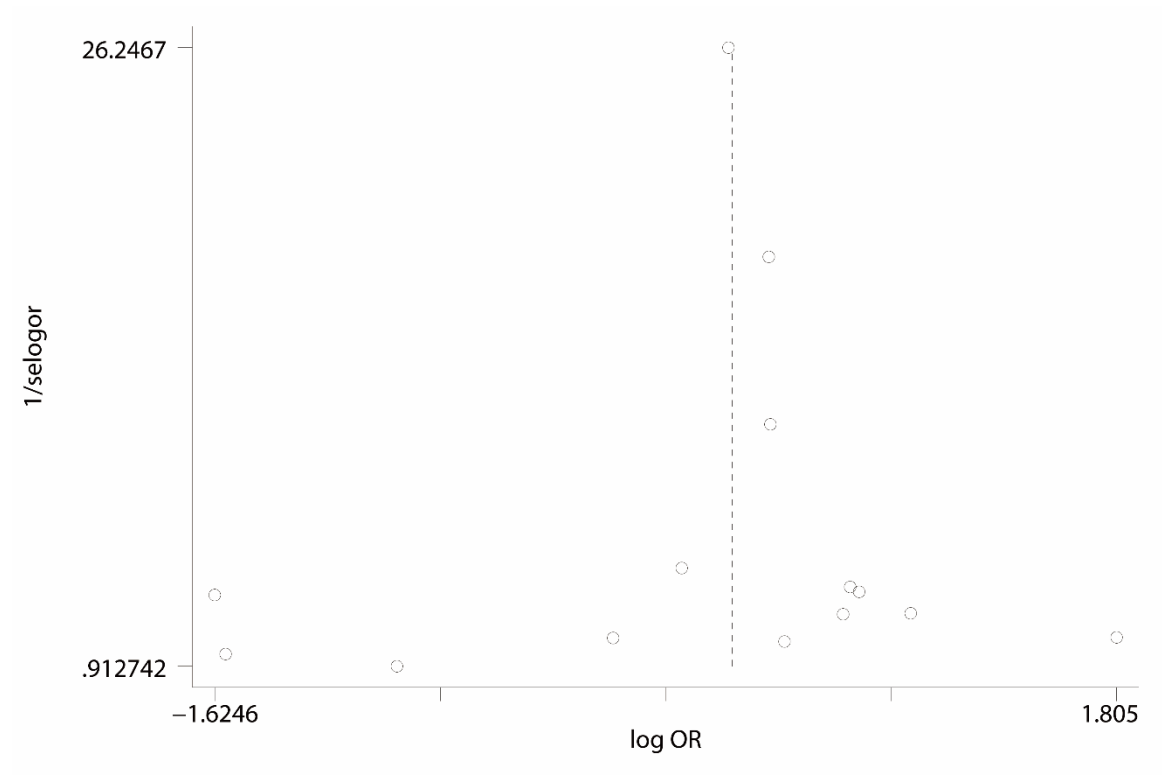

Supplementary Figure 20. Egger's publication bias plot of studies included in a meta-analysis to evaluate the risk factors for postoperative hypocalcaemia after thyroidectomy in adult patients.

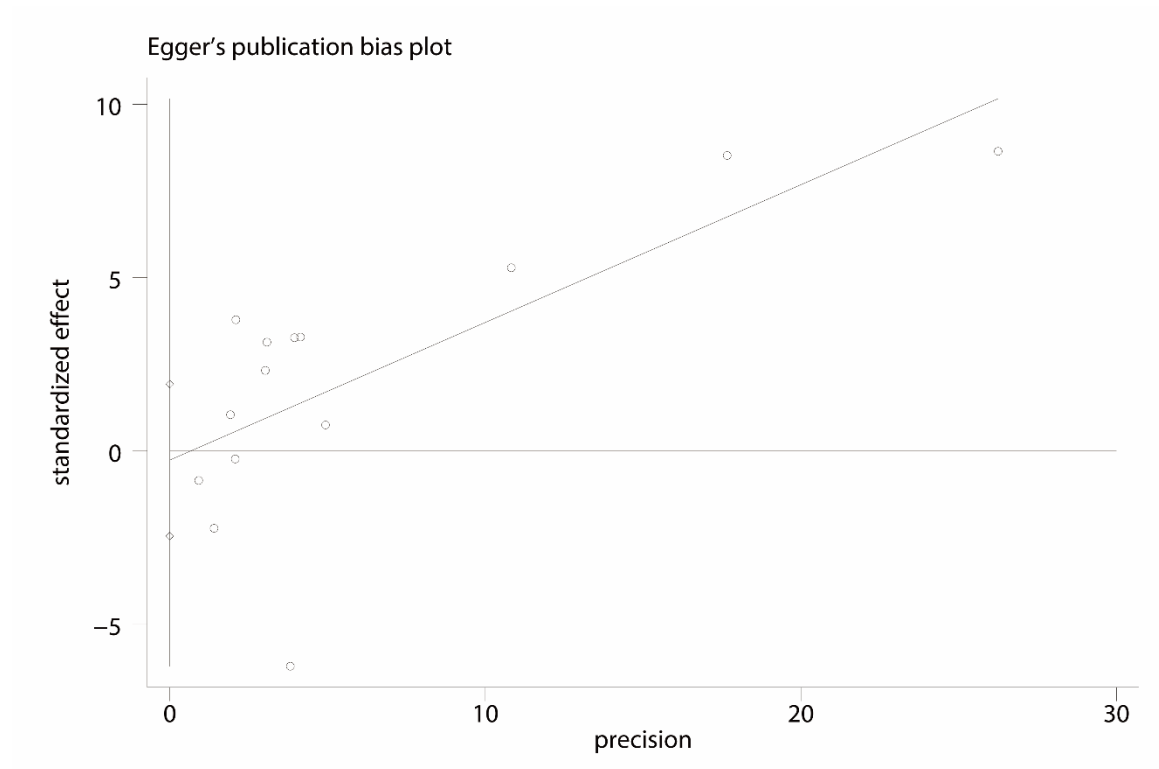

Supplement: sj-pdf-1-imr-10.1177_0300060521996911.pdf [file sj-pdf-1-imr-10.1177_0300060521996911.pdf]
